# Supplementary material for: On the Crystal Chemistry of Photochromic Yttrium Oxyhydride
Source: MDPI journal article supplement (doi:10.3390/en15051903), 2022-03-05
Supplement: s1 [file s1]

## Supplementary information

# On the Crystal Chemistry of Photochromic Yttrium Oxyhydride

Magnus H. Sørby \*, Fredrik Martinsen, Smagul Zh. Karazhanov, Bjørn C. Hauback and Erik S. Marstein

Institute for Energy Technology, P.O. Box 40, 2027 Kjeller, Norway;  
fredrikamartinsen@gmail.com (F.M.); smagul.karazhanov@ife.no (S.Z.K.);  
bjorn.hauback@ife.no (B.C.H.); erik.stensrud.marstein@ife.no (E.S.M.)

\* Correspondence: magnus.sorby@ife.no

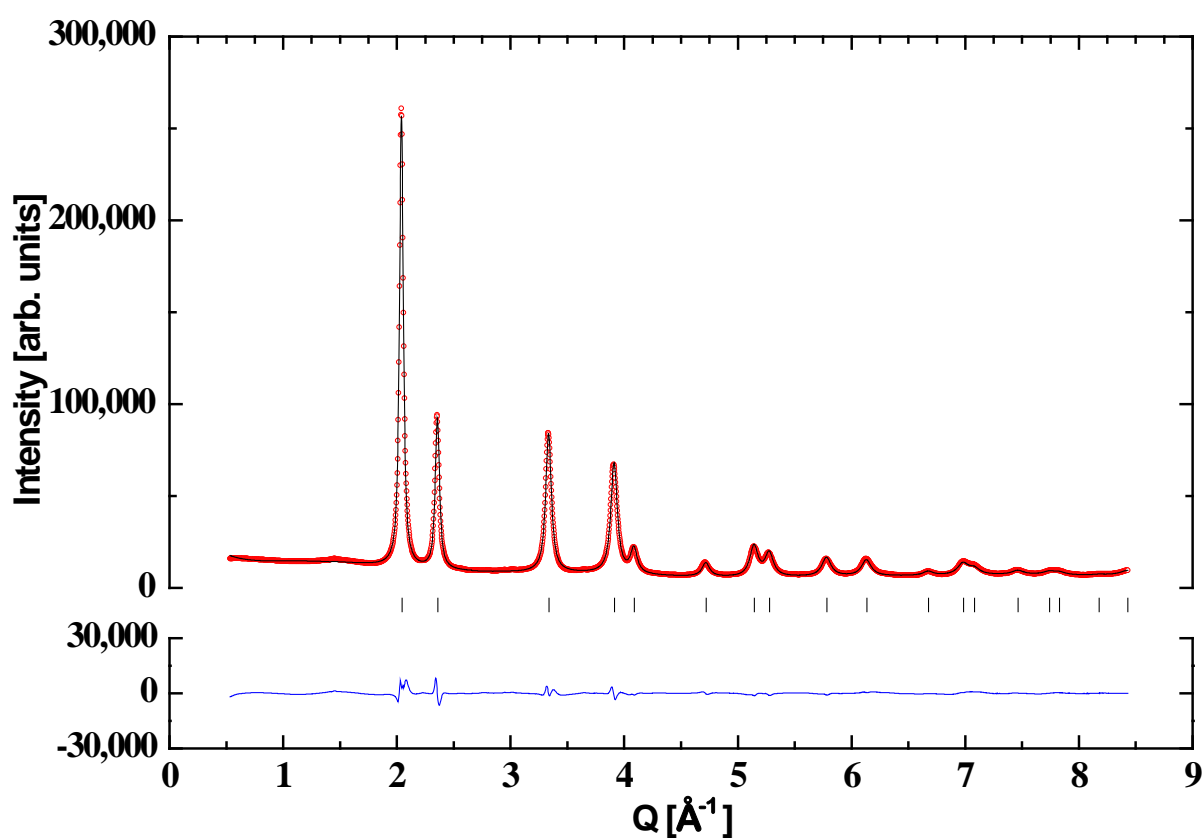

**Figure S1** Rietveld fit to SR-PXD data from joint refinement with PND data and composition  $\text{Y}(\text{D,H})_{3-2x}\text{O}_x$  ( $R_{\text{wp}} = 3.59$ ). The fit obtained to the PND data in the same refinement is shown in Figure 3b in the main manuscript.
